# Supplementary material for: An environmentally friendly bleaching process for cotton fabrics: mechanism and application of UV/H2O2 system
Source: Springer Nature journal article supplement (doi:10.1007/s10570-019-02812-3), 2019-11-07
Supplement: MOESM1 [file 17363370]

Supporting Information for

**An environmentally friendly bleaching process for cotton fabrics: Mechanism and application of UV/H2O2 system**

Nanfang Wang a, b, *[[1]](#footnote-1) , Peixin Tang b, Cunyi Zhao b, Zheng Zhang b, Gang Sun b, *

*a Hunan Provincial Key Laboratory of Environmental Catalysis & Waste Recycling, Hunan Institute of Engineering, Xiangtan, Hunan 411104, China*

*b Fiber and Polymer Science, University of California, Davis, CA 95616, USA*

Due to no intermediates or transition states found by using Gaussian computational programs of TS optimization and IRC, Potential energy surface (PES) scan was carried out to investigate the reaction paths for the Route 1-4 in Table 2 when H2O2 or HOO- was excited by UV light. PES was performed by stretching the specific chemical bonds in steps of 0.05 Å in the ground state and at each point re-optimizing the remaining structural parameters. Single-point energy calculations for vertical singlet excitations (four lowest excited states) were calculated at the B3LYP/6-31+G(d,p) level at each point along the dissociation pathways of the H2O2 and HOO-. The energy differences along the dissociation pathways are shown in Figure S1.


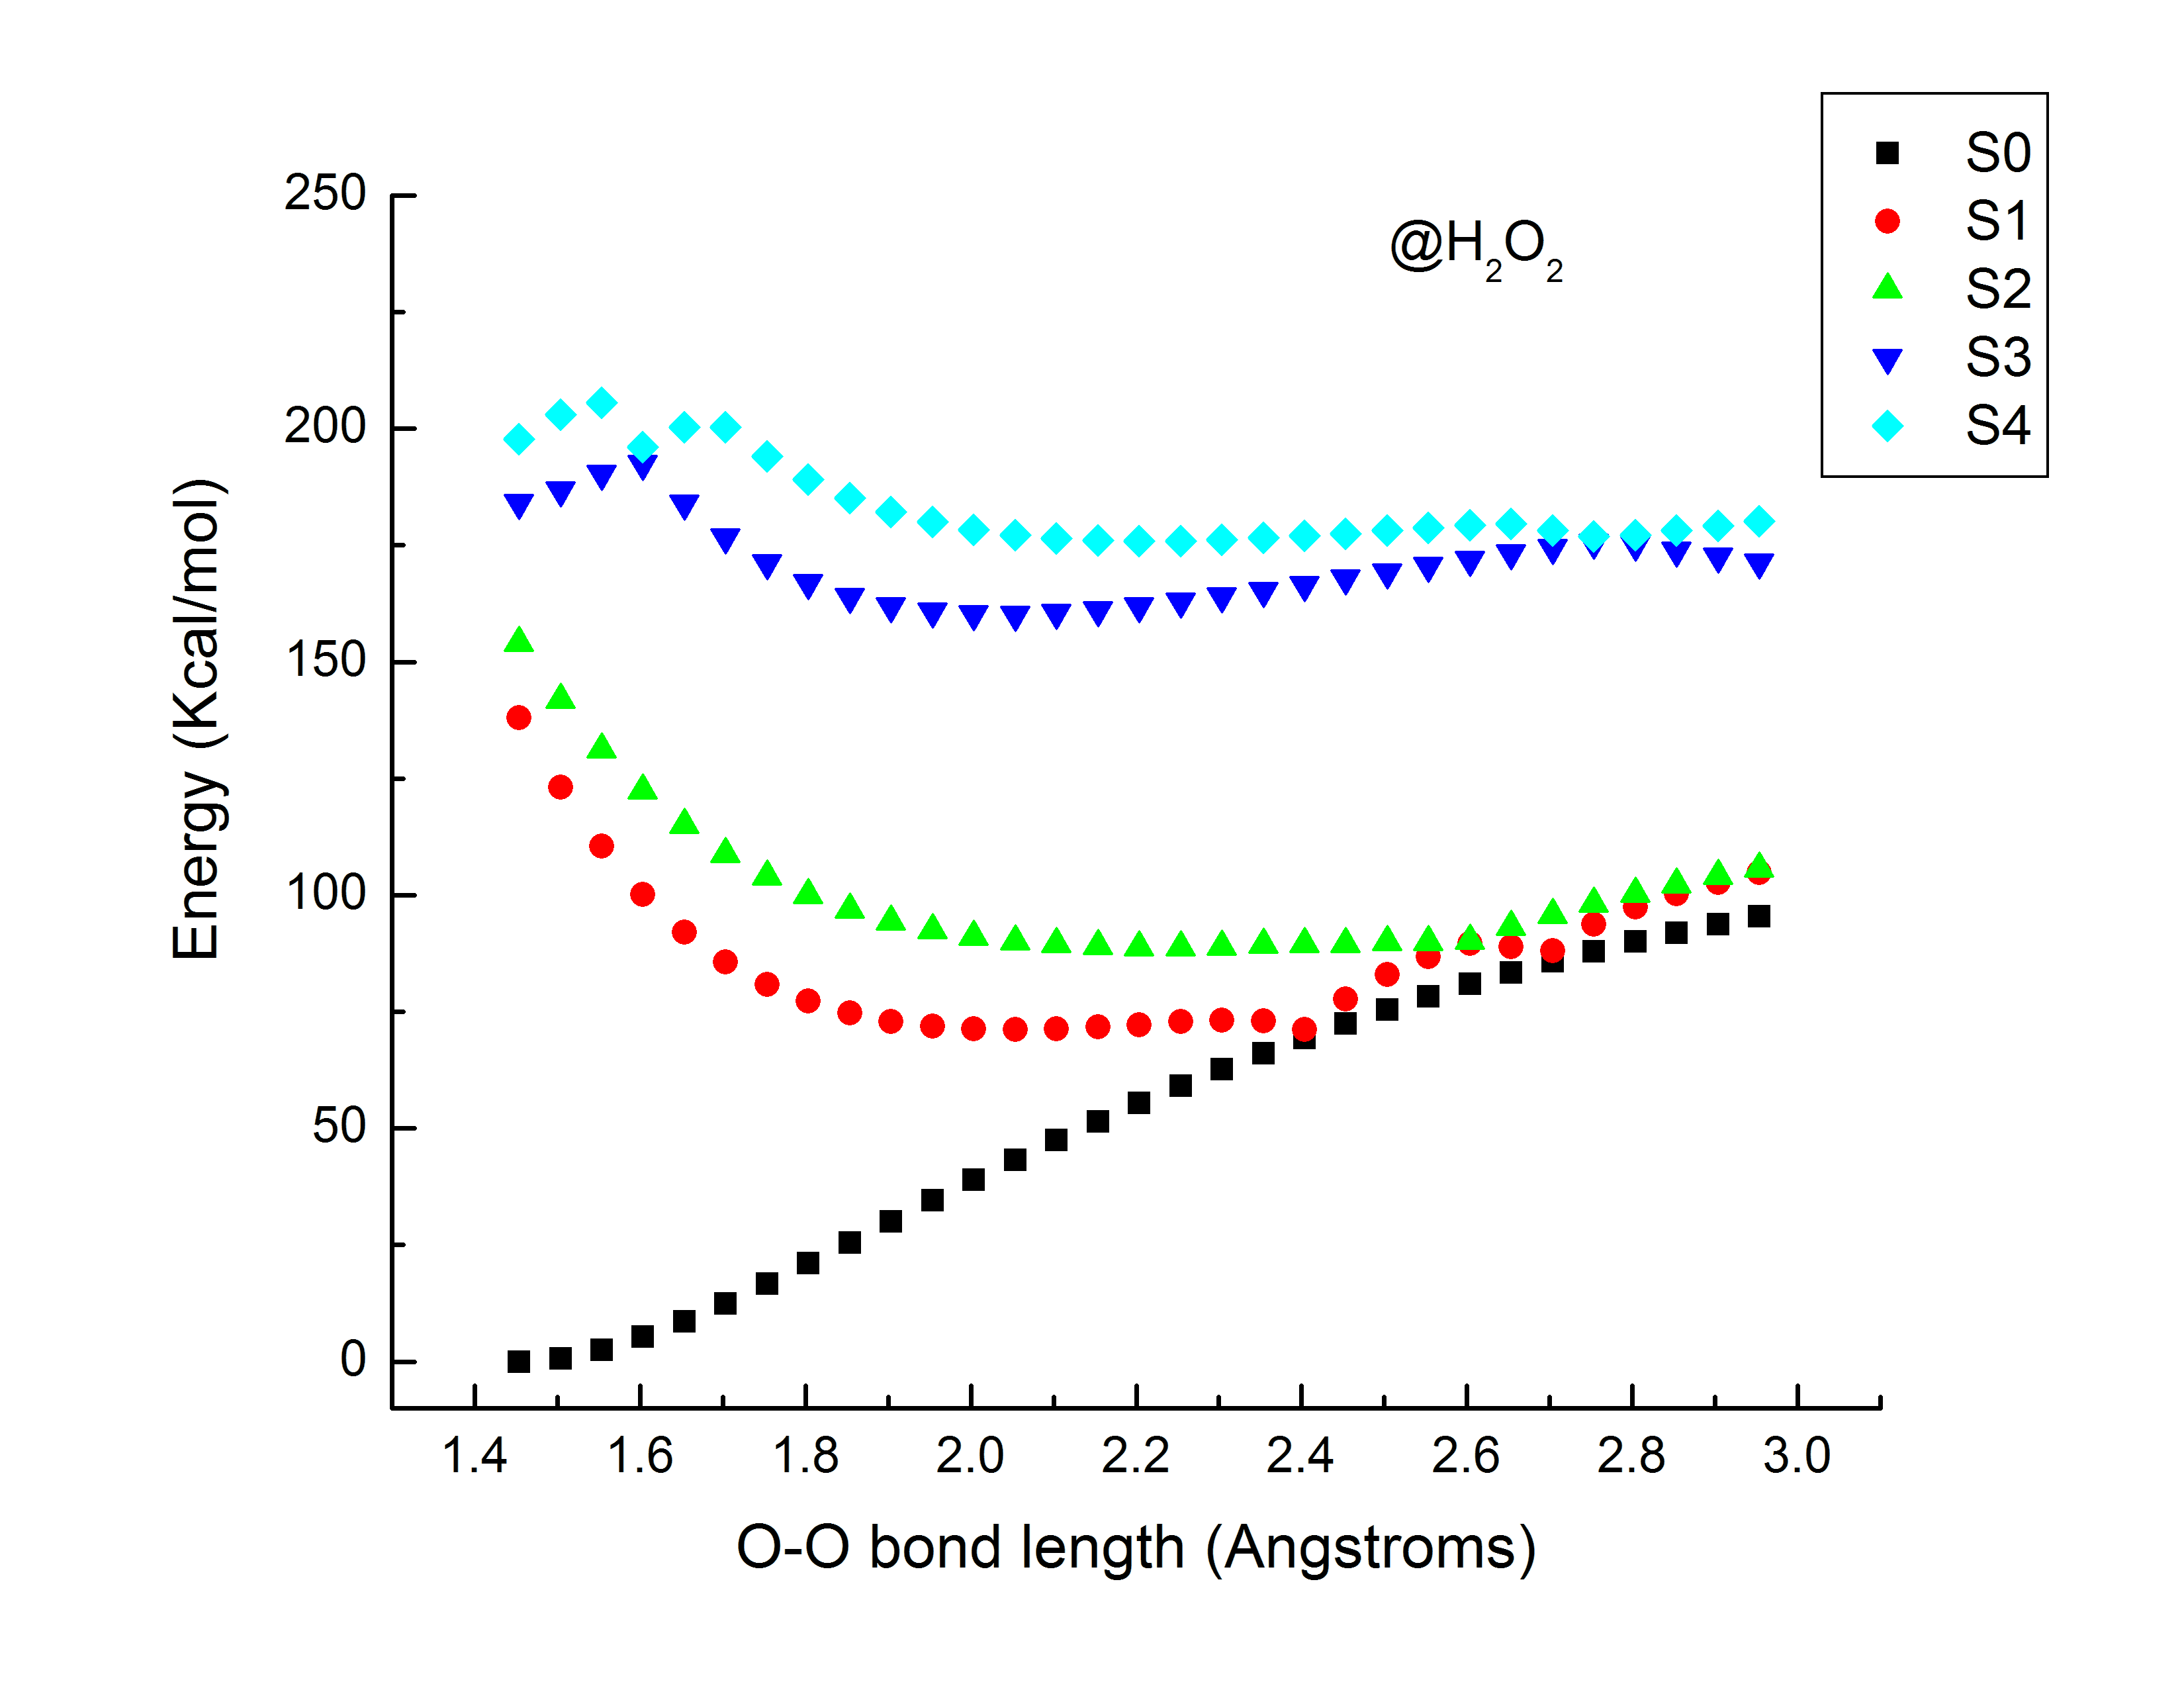

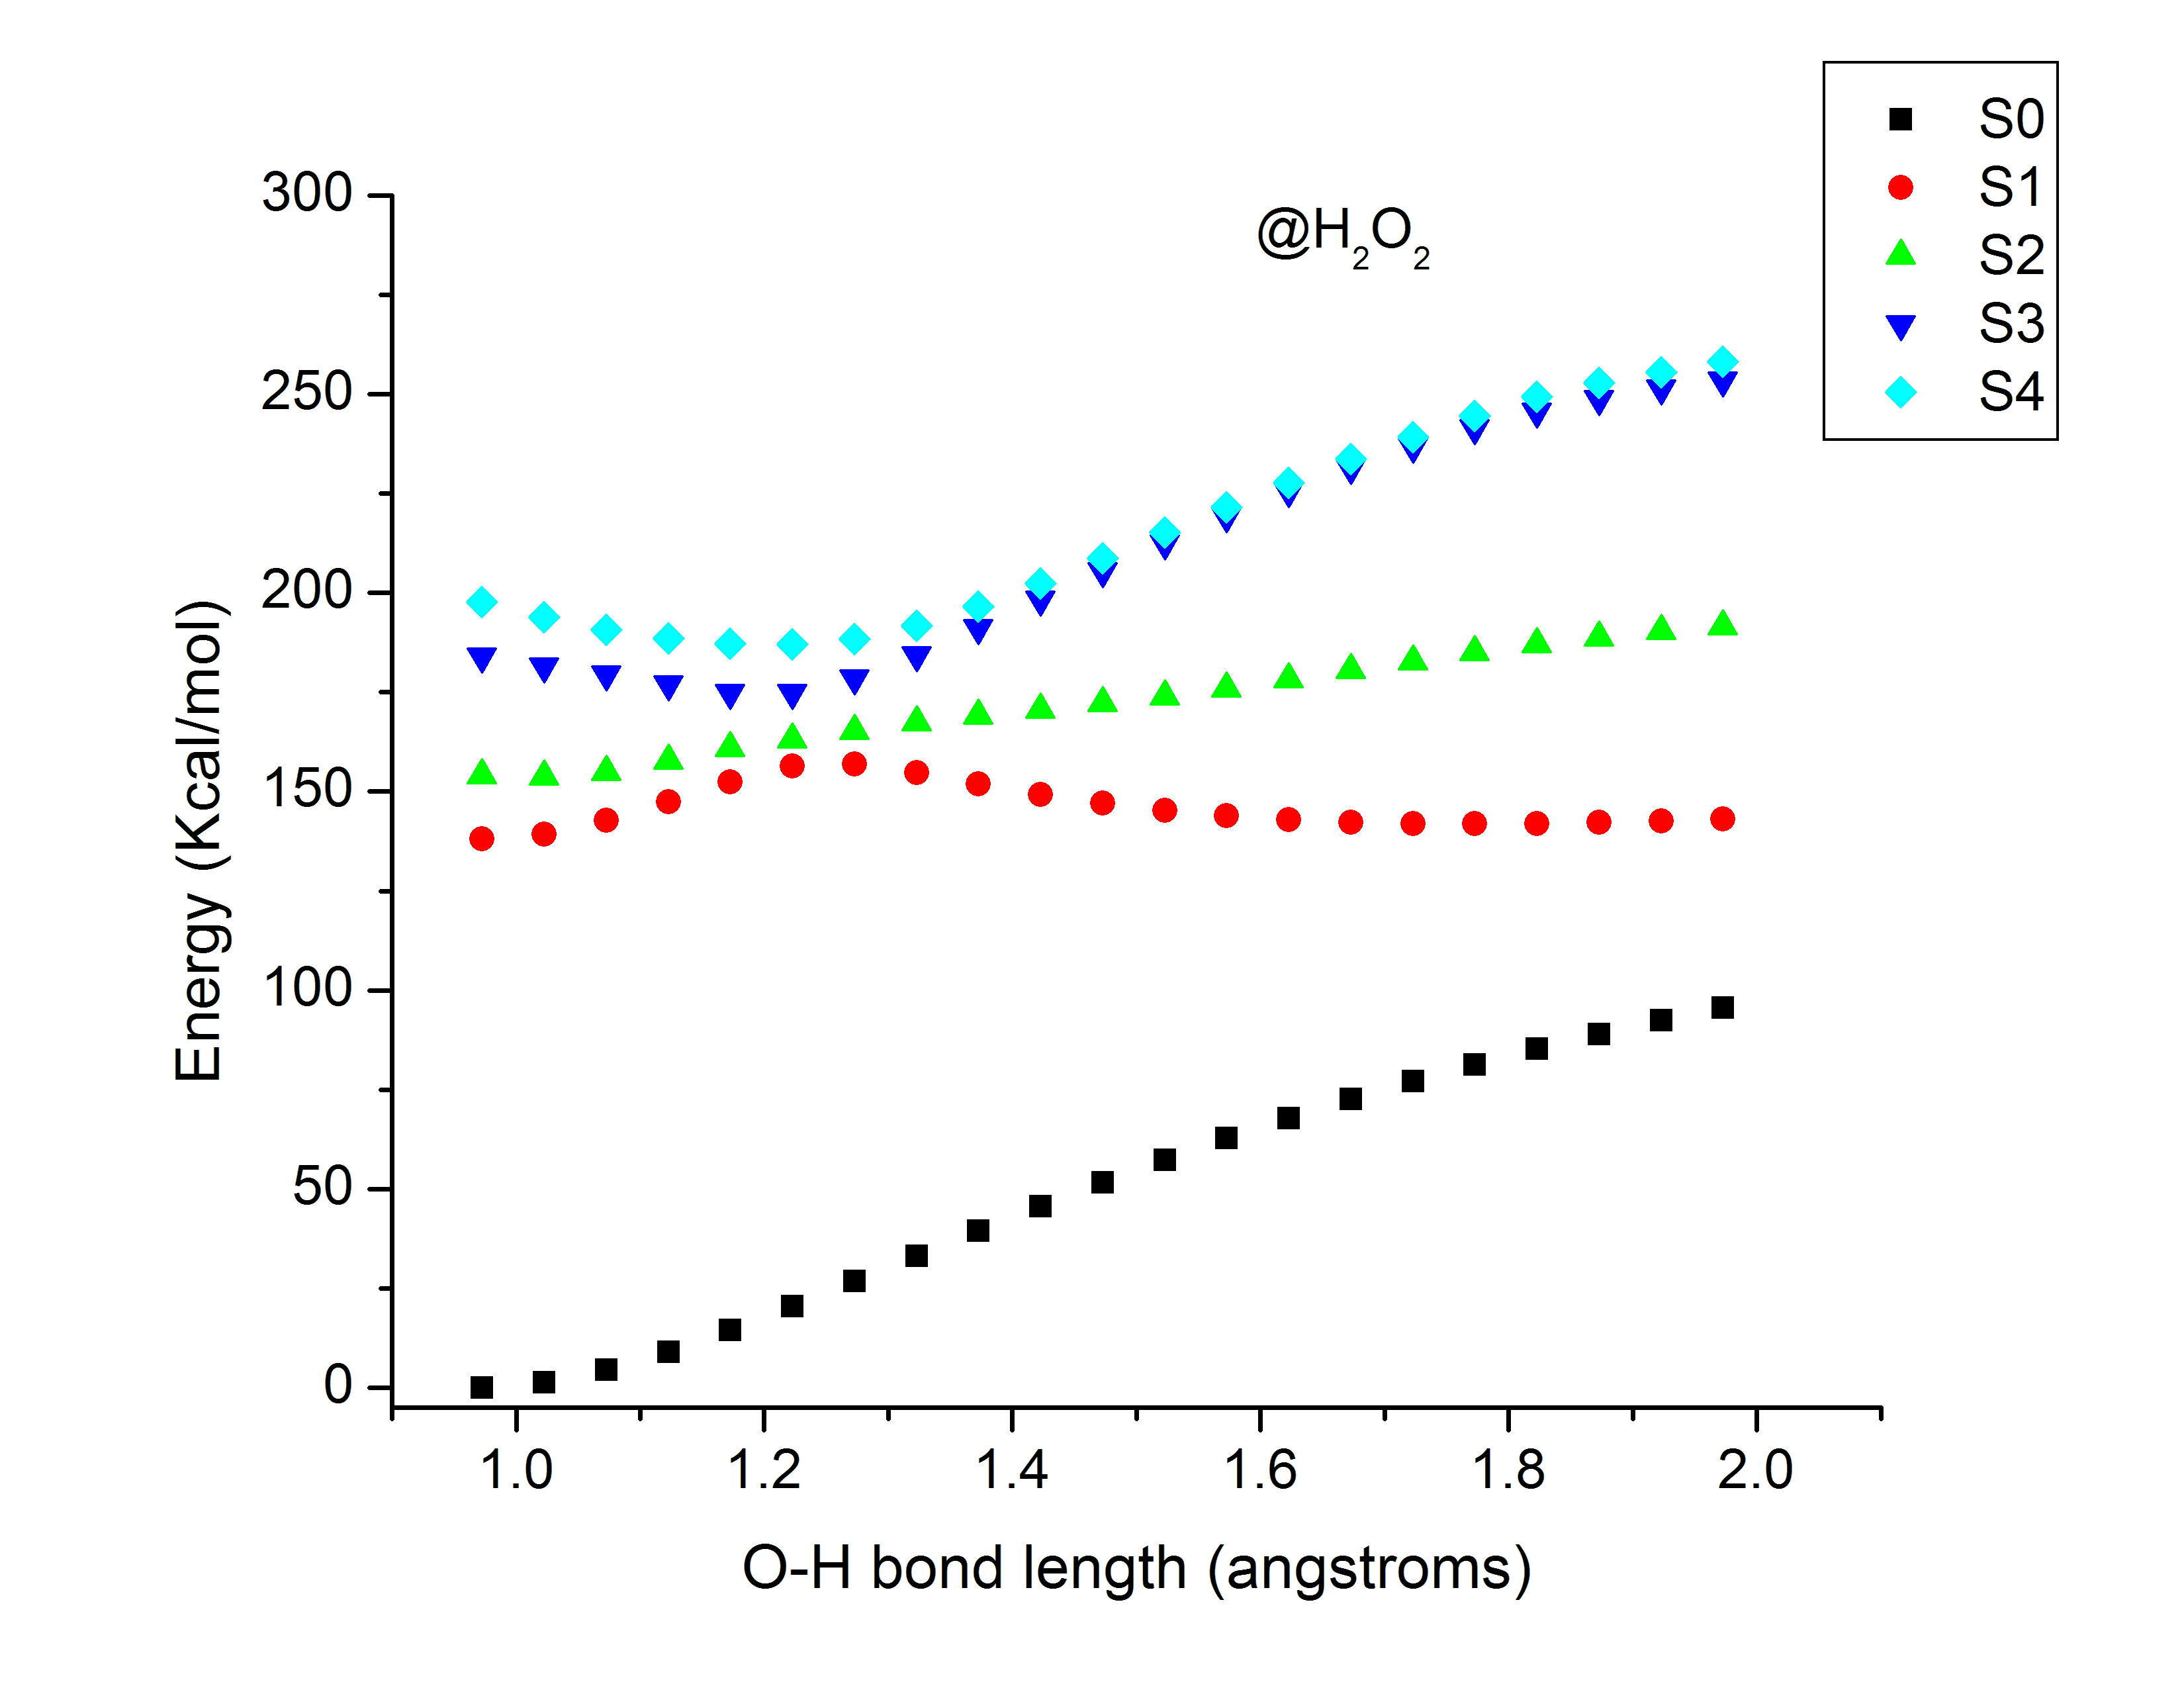


(a) (b)


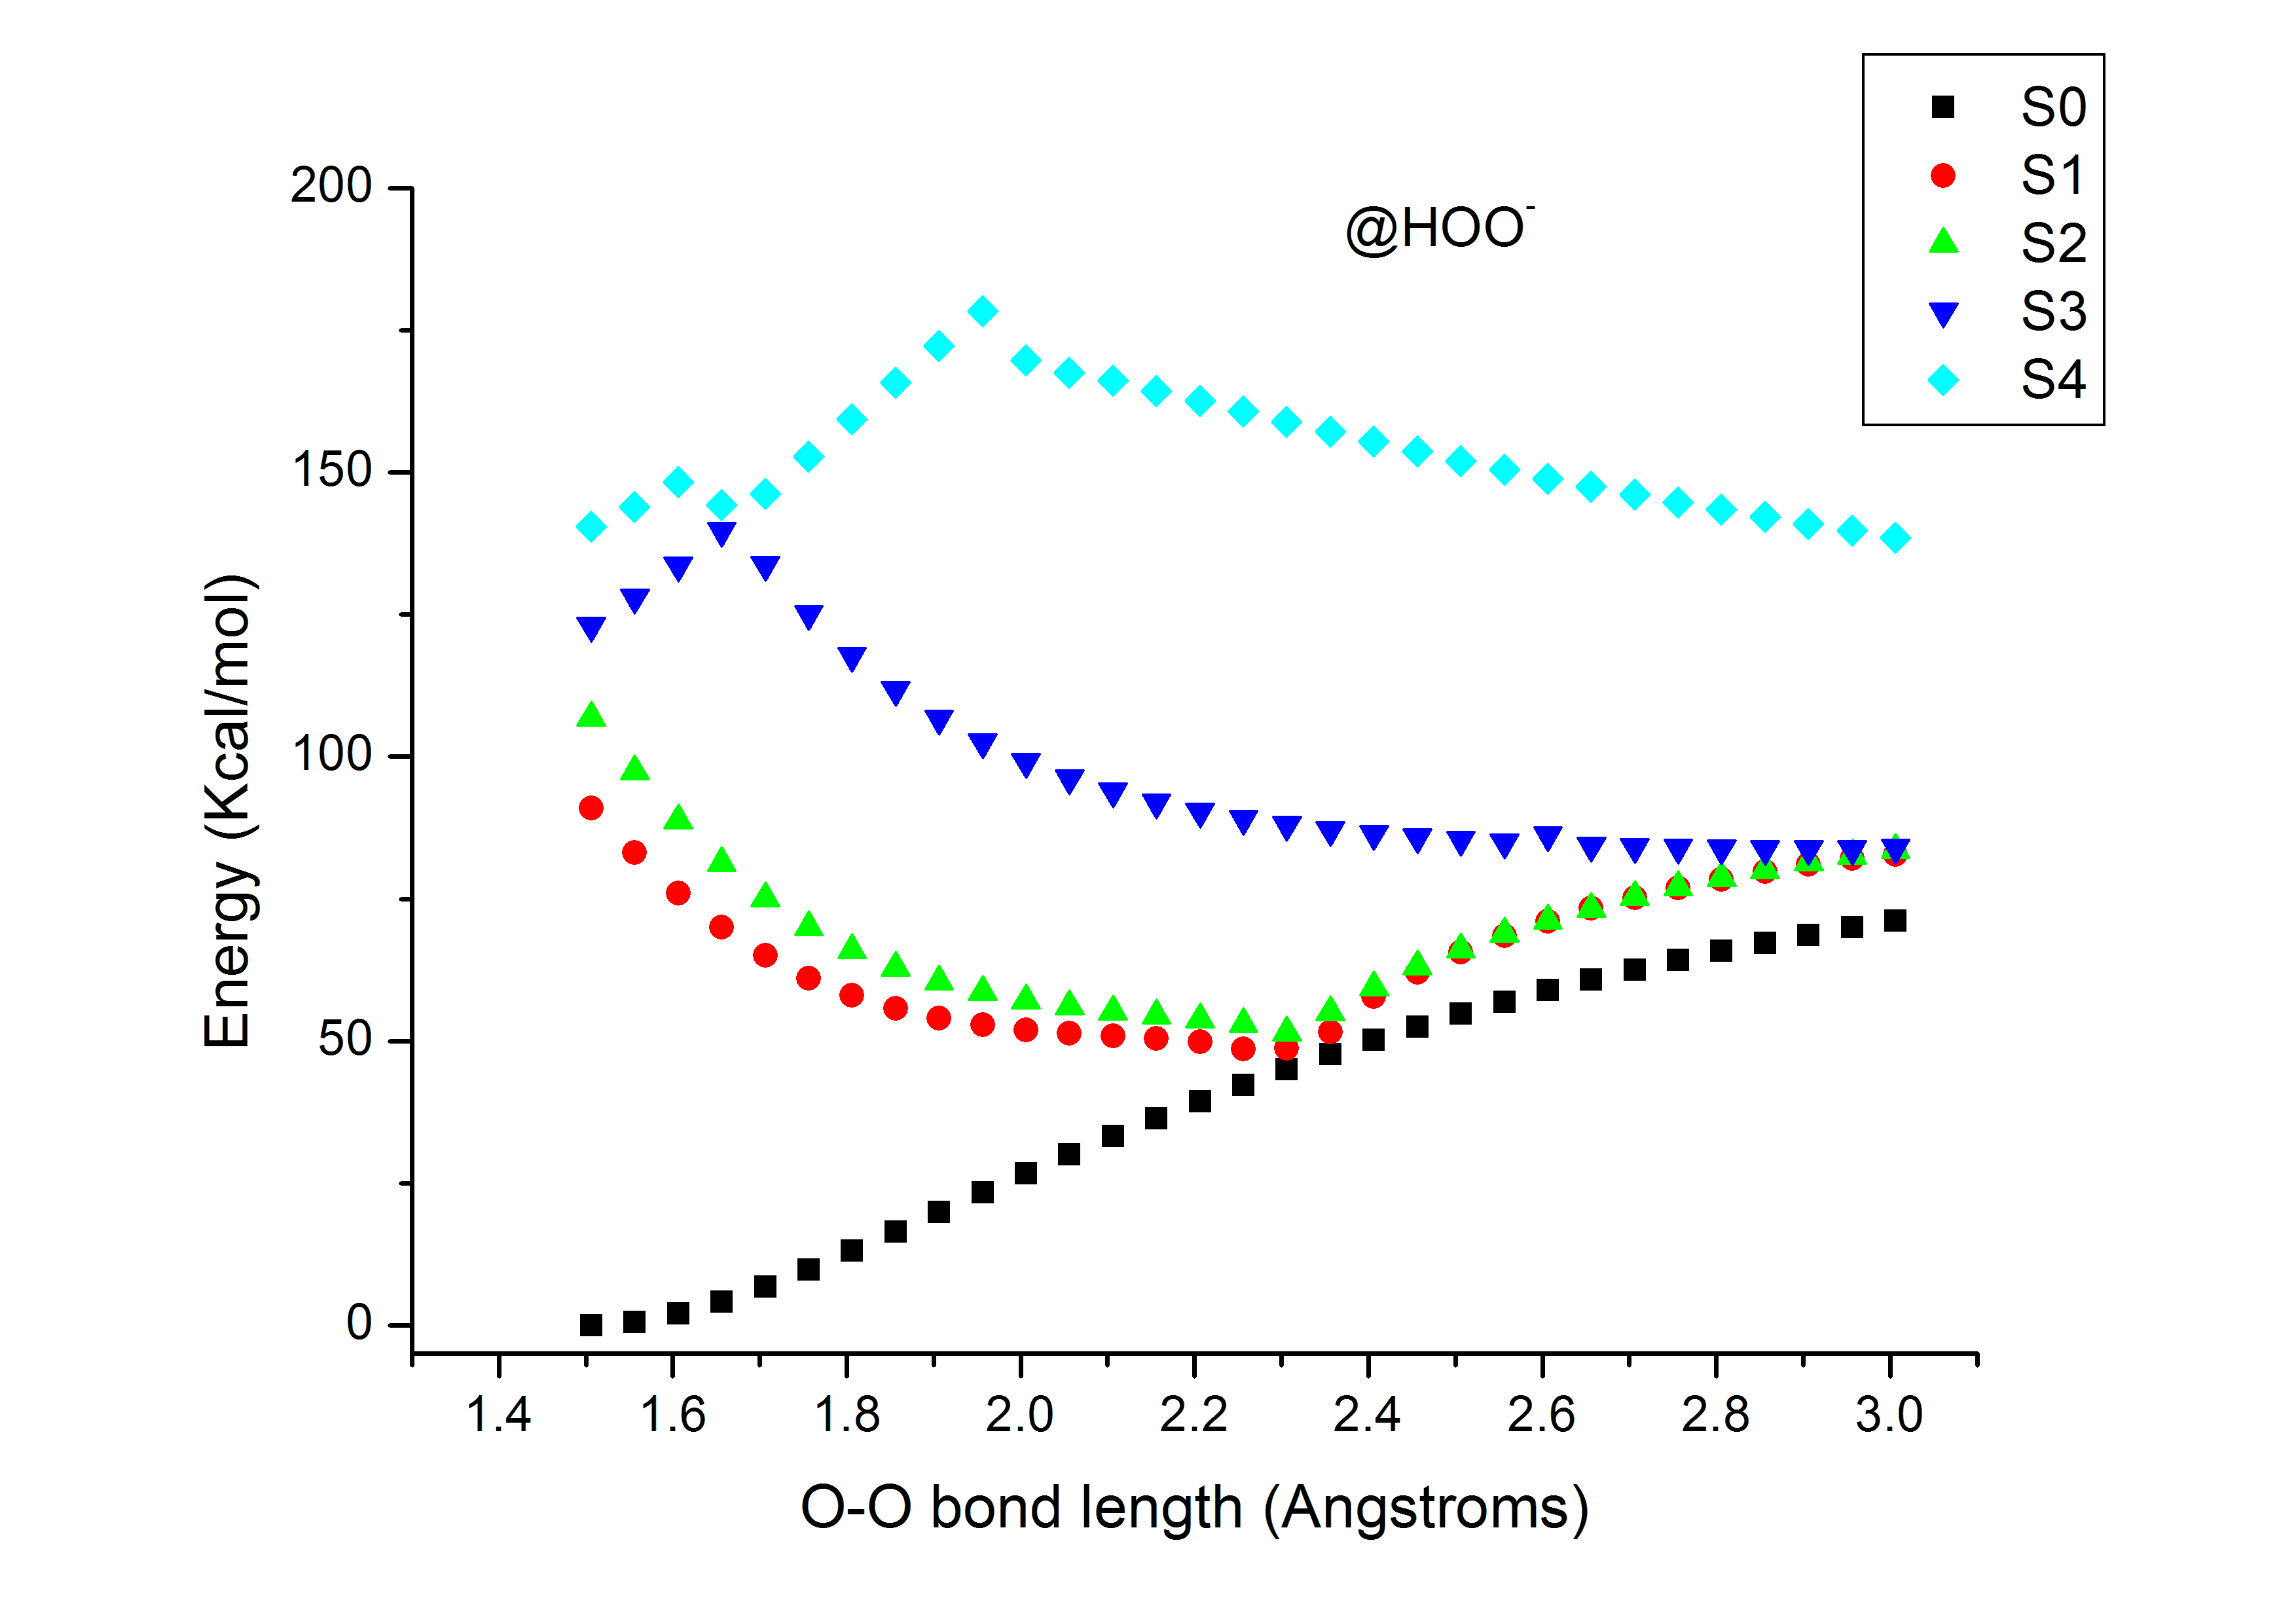

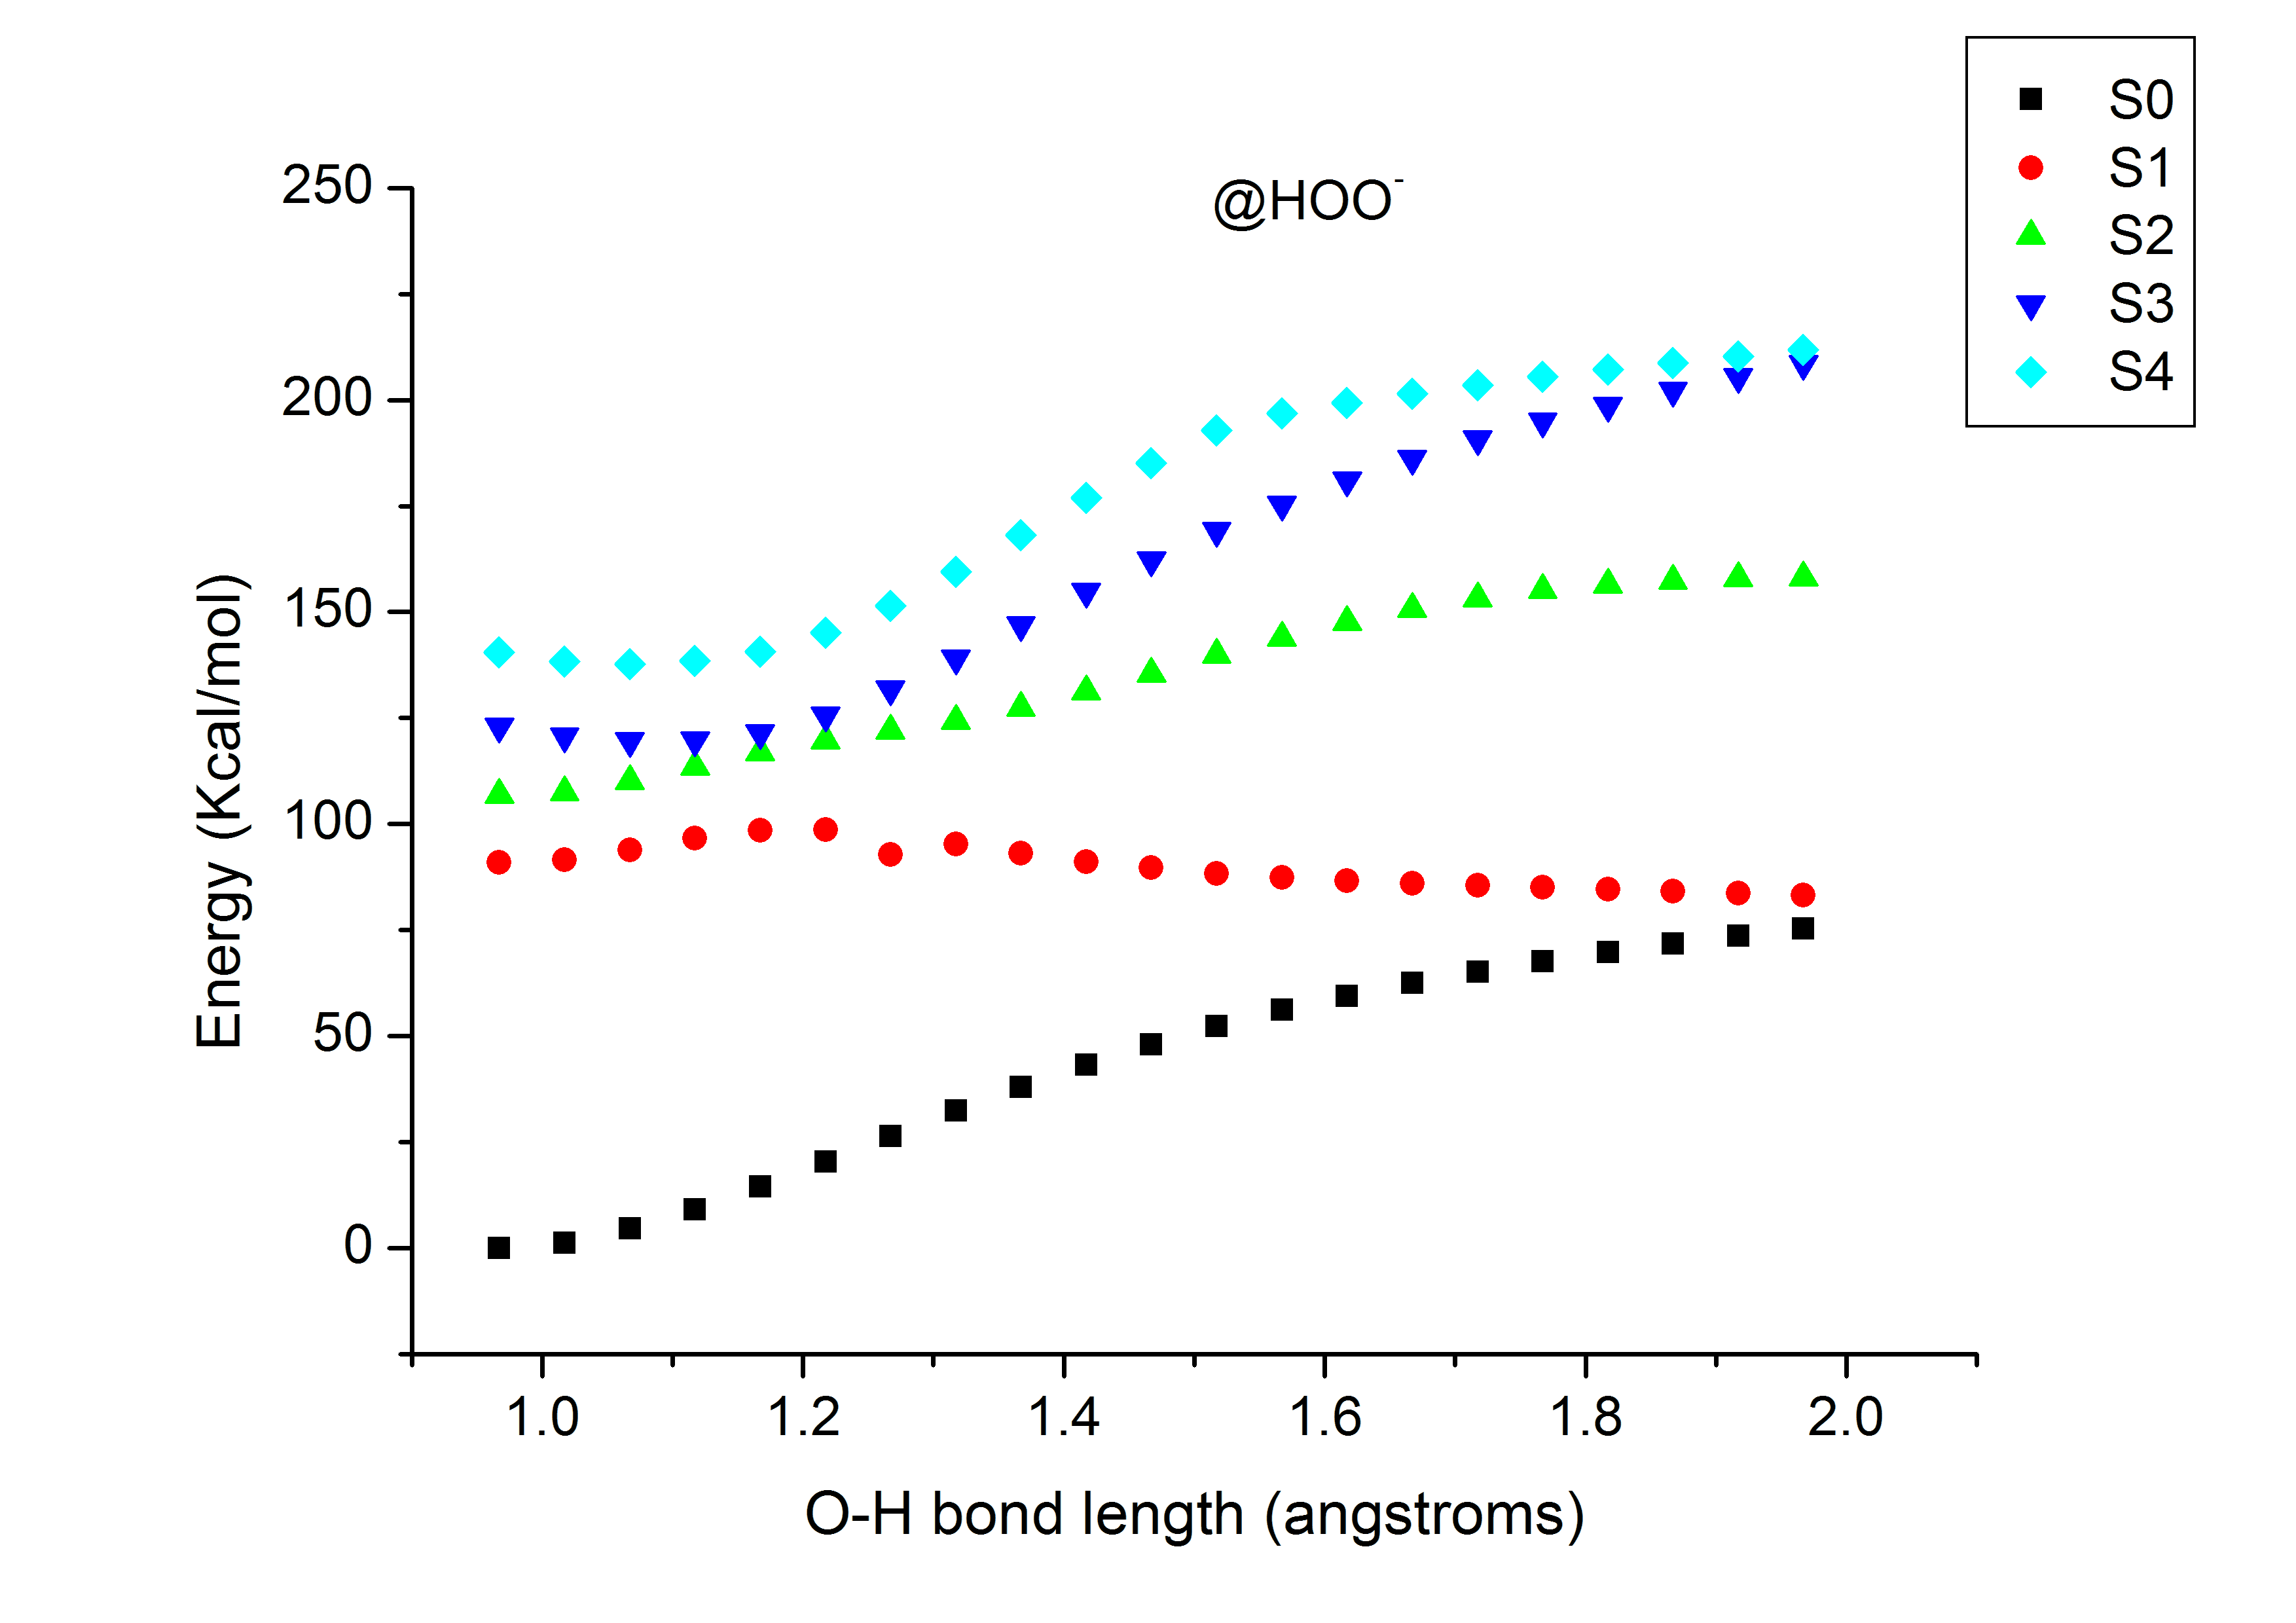


(c) (d)

Figure S1. Energy differences between ground state and the four lowest excited states of H2O2 and HOO- with O-O bond length and O-H bond length respectively. O-O bond: (a) and (c), O-H bond: (b) and (d).


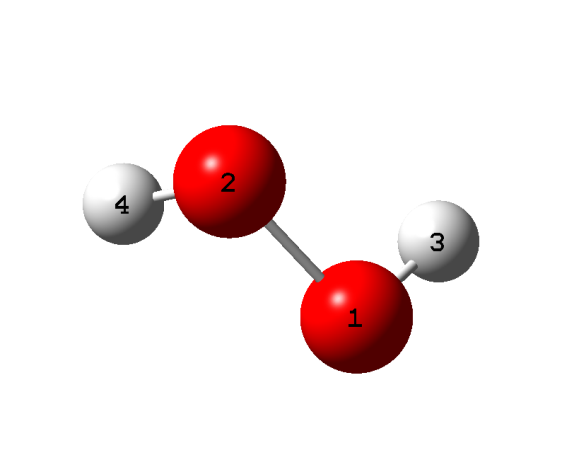


Figure S2. Optimized geometries of H2O2 at the B3LYP/6-31+G(d,p) level with scrf=(solvent=water). The Cartesian coordinates of this molecule are presented below.

---------------------------------------------------------------------------------------------------------

Center Atomic Atomic Coordinates (Angstroms)

Number Number Type X Y Z

--------------------------------------------------------------------------------------------------------

1 8 0 0.000000 0.726850 -0.064916

2 8 0 0.000000 -0.726850 -0.064916

3 1 0 0.753722 0.918945 0.519329

4 1 0 -0.753722 -0.918945 0.519329

----------------------------------------------------------------------------------------------------------


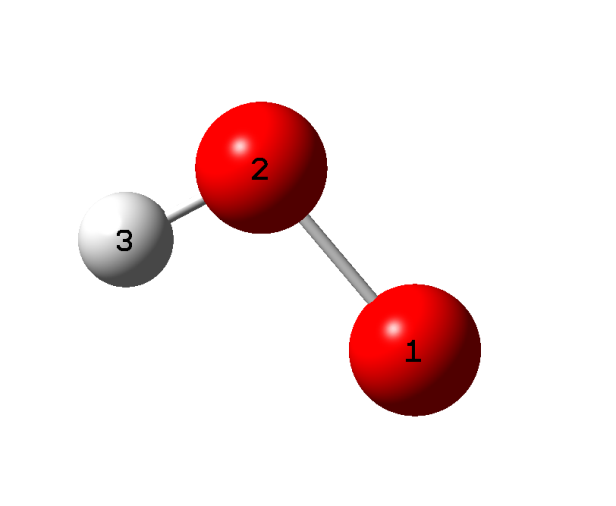


Figure S3. Optimized geometries of HOO- at the B3LYP/6-31+G(d,p) level with scrf=(solvent=water). The Cartesian coordinates of this molecule are presented below.

---------------------------------------------------------------------------------------------------------

Center Atomic Atomic Coordinates (Angstroms)

Number Number Type X Y Z

--------------------------------------------------------------------------------------------------------

1 8 0 0.056392 0.711300 0.000000

2 8 0 0.056392 -0.604700 0.000000

3 1 0 -0.902273 -0.852806 0.000000

-------------------------------------------------------------------------------------------------------

**Table S1 Ground state Gibbs energies of reactants and products and energy differences for Route 1-4 from Gaussian computations (Freq b3lyp/6-31+g(d,p) scrf=(solvent=water) Temperature=298.15 K ).**

| **Route** | **Reaction** | **Species** | **Gibbs (Hartree)** | **∆G(KJmol)** |
| --- | --- | --- | --- | --- |
| 1 | H2O2 → 2 HO• | H2O2 | -151.561994 |  |
|  |  | HO• | -75.752857 | 148.3259 |
| 2 | H2O2 → H• + HOO• | H2O2 | -151.561994 |  |
|  |  | H• | -0.510936 |  |
|  |  | HOO• | -150.930161 | 318.624 |
| 3 | HOO- → O-• + HO• | HOO- | -151.083201 |  |
|  |  | O-• | -75.270157 |  |
|  |  | HO• | -75.75286 | 158.6149 |
| 4 | HOO- → O2-•+ H• | HOO- | -151.083201 |  |
|  |  | O2-• | -150.480354 |  |
|  |  | H• | -0.510936 | 242.2314 |

1. * Corresponding author. Tel.: +8673158680125; +1 530-752-0840.

   *E-mail address*: cdwnf@126.com (N. Wang); gysun@ucdavis.edu (G. Sun). [↑](#footnote-ref-1)
